# Erratum

Bus SA, Yang QX, Wang JH, Smith MB, Wunderlich R, Cavanagh PR: Intrinsic muscle atrophy and toe deformity in the diabetic neuropathic foot: a magnetic resonance imaging study. *Diabetes Care* 25:1444–1450, 2002

On page 1444 of the above-listed article, in the first sentence in the RESEARCH DESIGN AND METHODS section of the abstract, the phrase “using multiple spin-echo magnetic resonance imaging” should read “using magnetic resonance imaging.” The correct sentence is listed below.

High-resolution T2-weighted fast spin-echo images and parametric T2 multiple spin-echo images were acquired using magnetic resonance imaging (MRI) of frontal plane sections of the metatarsal region of the foot in a sample of eight individuals with diabetic polyneuropathy and eight age- and sex-matched nonneuropathic nondiabetic control subjects.
